# Supplementary material
Source: Royal Society of Chemistry journal article supplement (doi:10.1039/d6nj00323k)
Supplement: d6nj00323k1.pdf [file d6nj00323k1.pdf]

## Electronic Supplementary Information (ESI)

### A Europium-Organic Framework with Activation-Induced Open Metal Sites for Water Adsorption

KaiZeng Quan,<sup>‡a</sup> YuMin Wang,<sup>‡b</sup> Meng Qi,<sup>a</sup> Peng Xu,<sup>a</sup> Hui Gong,<sup>c</sup> YaXing Wang,<sup>b</sup> GuoXun Ji<sup>\*a</sup>  
and Peng Yuan<sup>\*c</sup>

<sup>a</sup>Rocket Force University of Engineering, Xi'an 710025, PR China.

<sup>b</sup>State Key Laboratory of Radiation Medicine and Protection, School for Radiological and Interdisciplinary Sciences (RAD-X) and Collaborative Innovation Center of Radiation Medicine of Jiangsu Higher Education Institutions, Soochow University, Suzhou 215123, PR China.

<sup>c</sup>Department of Nuclear Medicine, Tangdu Hospital, Fourth Military Medical University, Xi'an 710038, PR China

#### 1. Supplementary figures

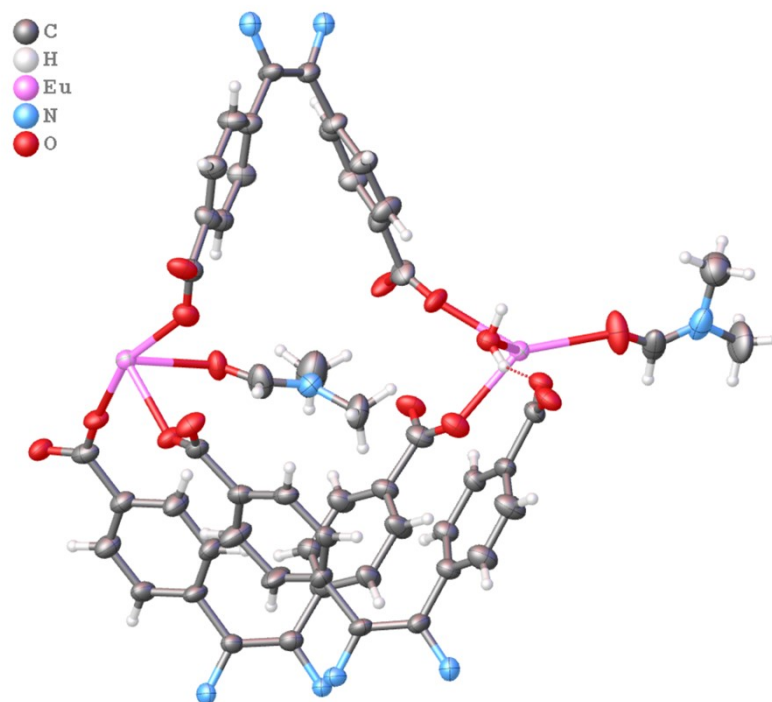

Figure S1. Thermal ellipsoids drawn at the 50% probability level for the asymmetric unit of Eu-H<sub>4</sub>TCPP.

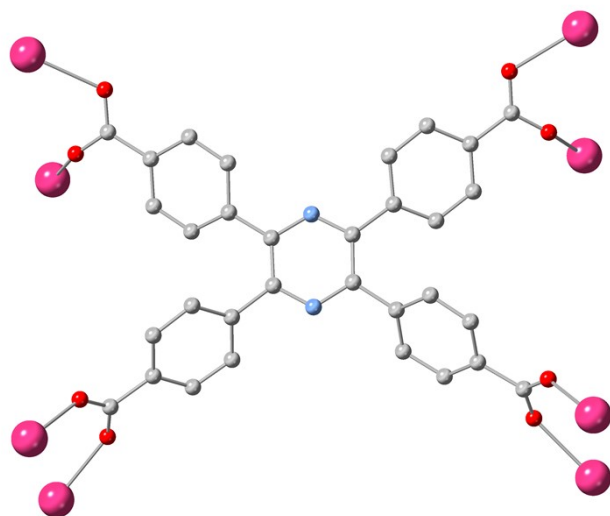

Figure S2. The coordination environment of H<sub>4</sub>TCPP.

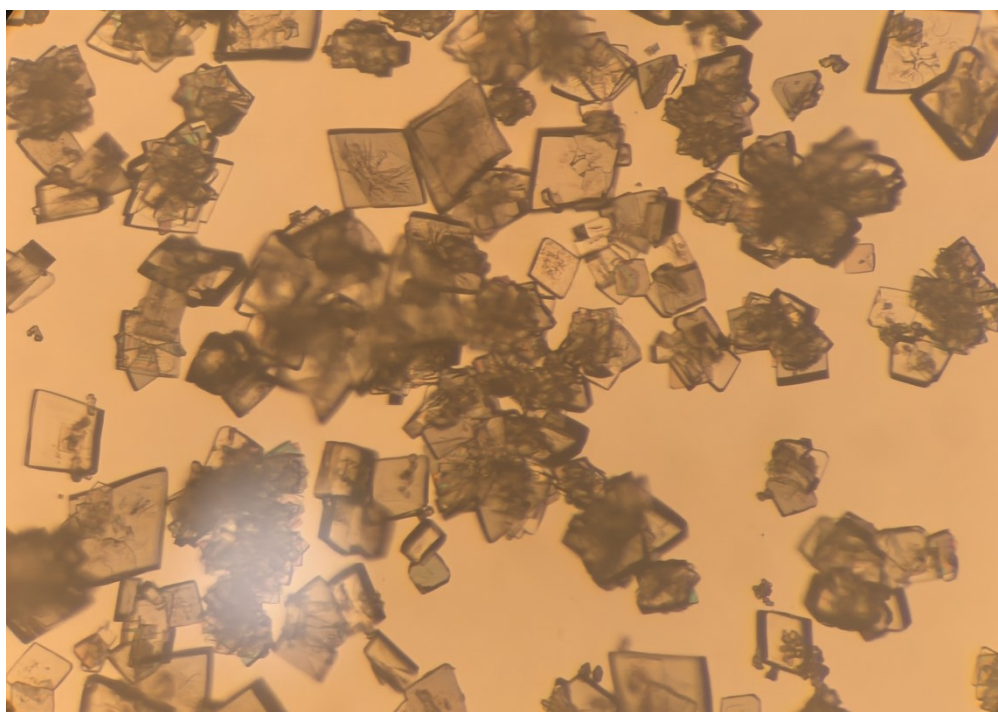

Figure S3. Microscopy images of Eu-H<sub>4</sub>TCPP.

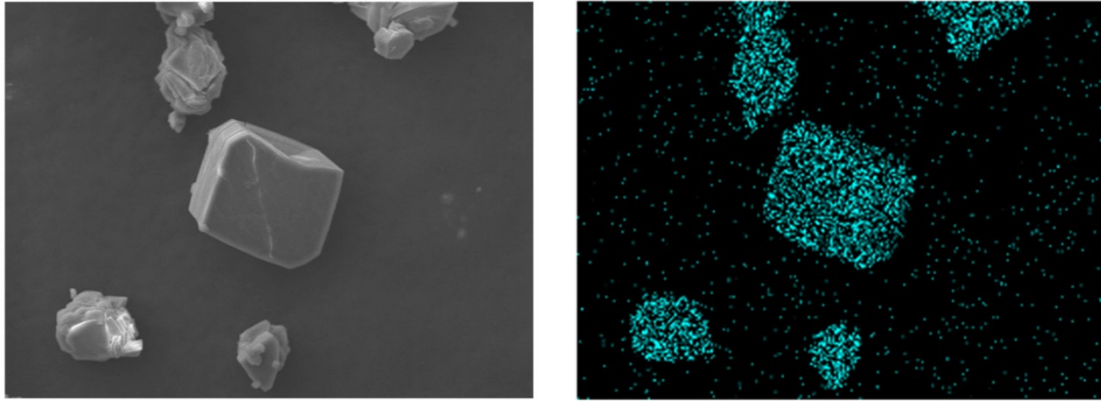

Figure S4. SEM of Eu-H<sub>4</sub>TCPP and relevant elemental mapping of Eu elements in Eu-H<sub>4</sub>TCPP.

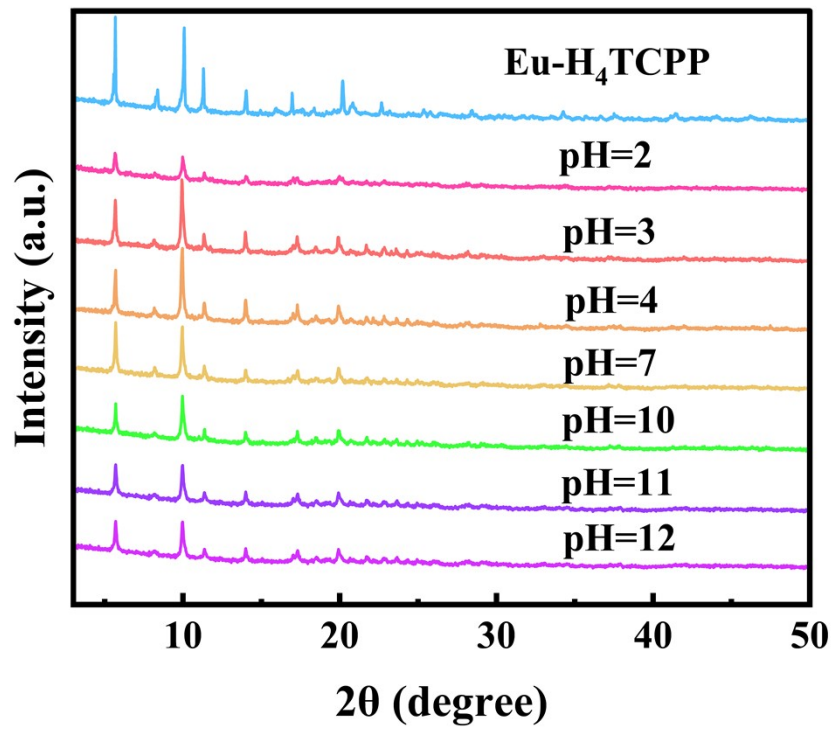

Figure S5. The PXRD patterns of Eu-H<sub>4</sub>TCPP after filtration from different pH solutions.

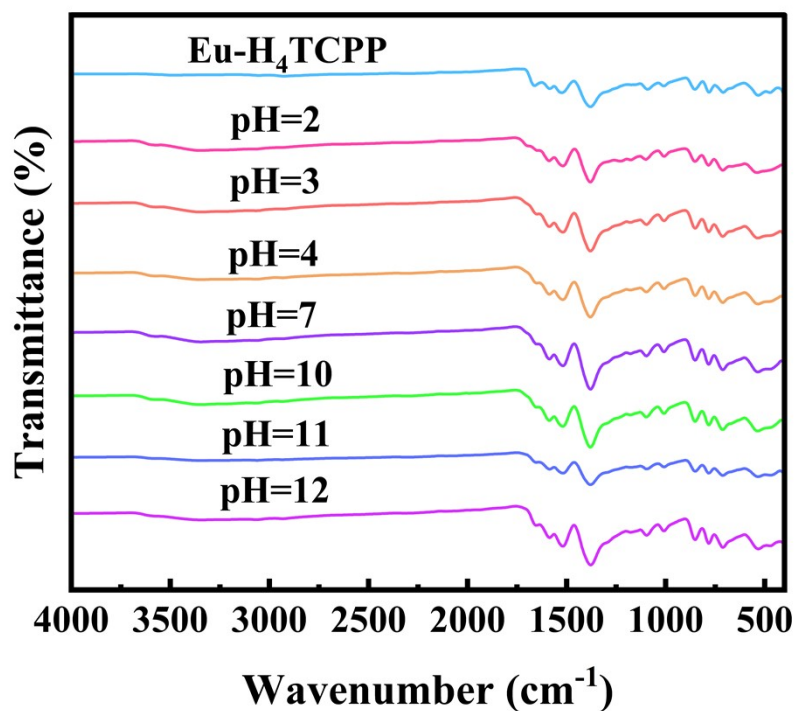

Figure S6. FTIR spectra of Eu-H<sub>4</sub>TCPP after filtration from different pH solutions.

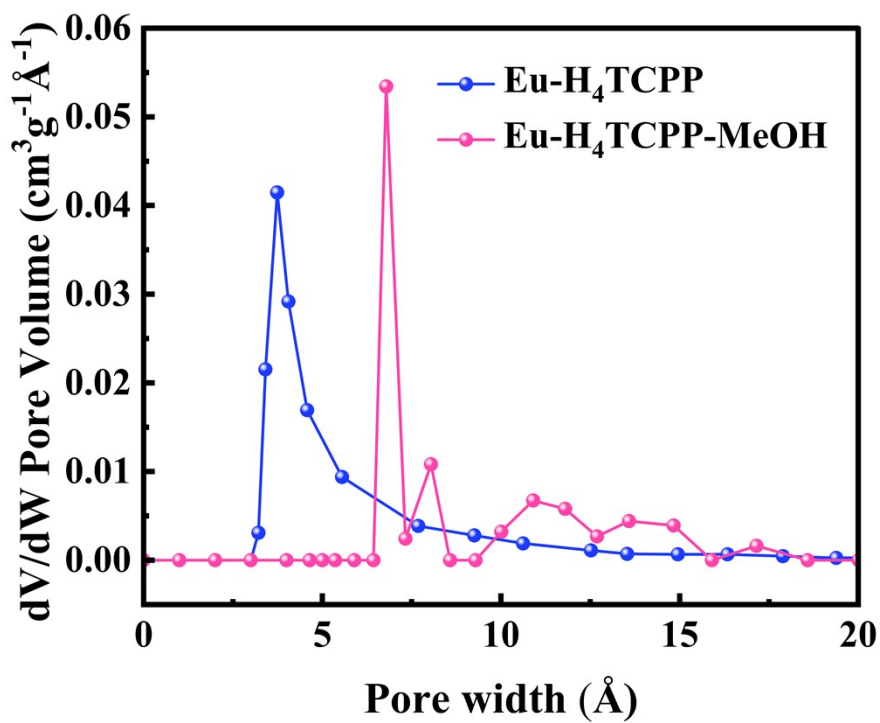

Figure S7. Comparison of pore size distributions between Eu-H<sub>4</sub>TCPP and Eu-H<sub>4</sub>TCPP-MeOH.

## 2. Supplementary tables

Table S1. Crystal data and structure refinements for Eu-H<sub>4</sub>TCPP.

| Compound                                | EU-H <sub>4</sub> TCPP                                                                             |
|-----------------------------------------|----------------------------------------------------------------------------------------------------|
| Chemical formula                        | [Eu <sub>2</sub> (TCPP) <sub>1.5</sub> (DMF) <sub>2</sub> (H <sub>2</sub> O)]·DMF·H <sub>2</sub> O |
| Molecular formula                       | C <sub>57</sub> H <sub>49</sub> Eu <sub>2</sub> N <sub>6</sub> O <sub>17</sub>                     |
| Formula weight                          | 1393.94 g mol <sup>-1</sup>                                                                        |
| Temperature,                            | 296.15 K                                                                                           |
| Crystal system                          | orthorhombic                                                                                       |
| Space group                             | <i>Pnma</i>                                                                                        |
| <i>a</i>                                | 21.1302(18) Å                                                                                      |
| <i>b</i>                                | 31.469(3) Å                                                                                        |
| <i>c</i>                                | 17.4141(17) Å                                                                                      |
| <i>α</i>                                | 90°                                                                                                |
| <i>β</i>                                | 90°                                                                                                |
| <i>γ</i>                                | 90°                                                                                                |
| Cell volume                             | 11579.4(19) Å <sup>3</sup>                                                                         |
| <i>Z</i>                                | 8                                                                                                  |
| $\rho_{\text{calc}}$                    | 1.599 g cm <sup>-3</sup>                                                                           |
| $\mu$                                   | 2.222 mm <sup>-1</sup>                                                                             |
| F (000)                                 | 5560                                                                                               |
| Reflections collected                   | 156574                                                                                             |
| Independent reflections                 | 10837 [ $R_{\text{int}} = 0.0665$ , $R_{\text{sigma}} = 0.02$ ]                                    |
| Goodness-of-fit on F <sup>2</sup>       | 1.176                                                                                              |
| Final R indexes [ $I \geq 2\sigma(I)$ ] | $R_1 = 0.0625$ , $wR_2 = 0.1195$                                                                   |
| Final R indexes [all data]              | $R_1 = 0.0798$ , $wR_2 = 0.1293$                                                                   |

Table S2. Selected Bond Lengths (Å) of Eu-H<sub>4</sub>TCPP.

| Atom-Atom              | Length, Å |
|------------------------|-----------|
| Eu01-O004              | 2.330 (5) |
| Eu01-O005              | 2.325 (5) |
| Eu01-O007 <sup>2</sup> | 2.345 (4) |
| Eu01-O008 <sup>3</sup> | 2.378 (5) |
| Eu01-O00A <sup>1</sup> | 2.442 (5) |
| Eu01-O00B              | 2.271 (5) |
| Eu01-O00E              | 2.455 (5) |
| Eu02-O003              | 2.581 (5) |
| Eu02-O006              | 2.330 (5) |
| Eu02-O009 <sup>4</sup> | 2.419 (5) |
| Eu02-O00C <sup>4</sup> | 2.348 (5) |
| Eu02-O00D <sup>5</sup> | 2.345 (5) |
| Eu02-O00H              | 2.387 (5) |
| Eu02-O00I <sup>5</sup> | 2.460 (5) |
| Eu02-O00M              | 2.475 (6) |

Symmetry Codes: <sup>1</sup> = 2-X, 1-Y, 1-Z; <sup>2</sup> = 3/2-X, 1-Y, 1/2+Z; <sup>3</sup> = 1/2+X, +Y, 1/2-Z; <sup>4</sup> = 1-X, 1-Y, 1-Z;  
<sup>5</sup> = -1/2+X,+Y,1/2-Z.

Table S3. The parameters of porous structure of Eu-H<sub>4</sub>TCPP.

| Specific surface area, m <sup>2</sup> g <sup>-1</sup> |          | $V_{\text{pore}}$ , cm <sup>3</sup> g <sup>-1</sup> |        | $V_{\text{ads}}(\text{N}_2)^a$ , cm <sup>3</sup> (STP) g <sup>-1</sup> |
|-------------------------------------------------------|----------|-----------------------------------------------------|--------|------------------------------------------------------------------------|
| Langmuir                                              | BET      | Total <sup>a</sup>                                  | T-Plot |                                                                        |
| 210.8996                                              | 181.3377 | 0.0792                                              | 0.0700 | 53.3151                                                                |

Table S4. The parameters of porous structure of Eu-H<sub>4</sub>TCPP-MeOH.

| Specific surface area, m <sup>2</sup> g <sup>-1</sup> |          | $V_{\text{pore}}$ , cm <sup>3</sup> g <sup>-1</sup> |        | $V_{\text{ads}}(\text{N}_2)^a$ , cm <sup>3</sup> (STP) g <sup>-1</sup> |
|-------------------------------------------------------|----------|-----------------------------------------------------|--------|------------------------------------------------------------------------|
| Langmuir                                              | BET      | Total <sup>a</sup>                                  | T-Plot |                                                                        |
| 484.4810                                              | 331.5275 | 0.1695                                              | 0.1540 | 110.0862                                                               |
